# Supplementary material
Source: PubMed Central journal article supplement (PMC3697612)
Supplement: IAI.00173-13_zii999090181so1.pdf [file IAI.00173-13_zii999090181so1.pdf]

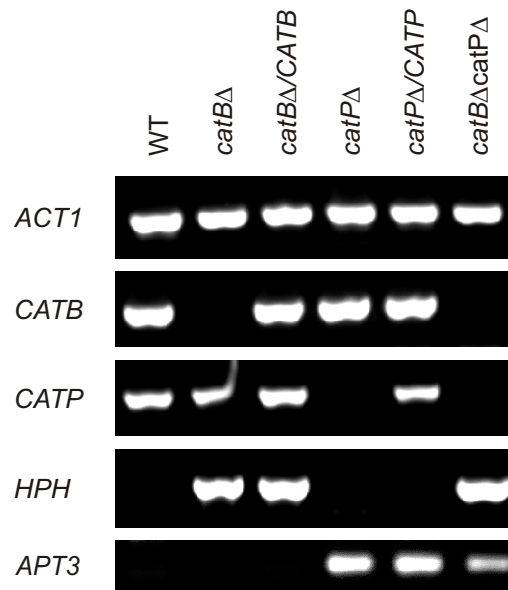

**Supporting Information Figure 1. Molecular confirmation of *CATB* and *CATP* gene deletion strains.**

Loss of *CATB* and *CATP* genes in the *catBΔ*, *catPΔ*, and *catBΔ catPΔ* mutant strains was verified by PCR. Genomic DNA from each mutant strain was tested for the *CATB* and *CATP* genes using *CATB* and *CATP* CDS-specific primers. Additionally, PCR was performed using primers corresponding to the CDS regions of the selection markers hygromycin phosphotransferase (*hph*) and aminoglycoside phosphotransferase (*apt*) which mark the *catBΔ* and *catPΔ* deletion alleles, respectively. The competence of genomic DNA for PCR amplification was validated using amplification of the actin (*ACT1*) CDS.
